# Supplementary material for: Systems Modelling of NHEJ Reveals the Importance of Redox Regulation of Ku70/80 in the Dynamics of DNA Damage Foci
Source: PubMed Central journal article supplement (PMC3566652; doi:10.1371/journal.pone.0055190), 2013-02-06
Supplement: pone.0055190.s001.pdf [file pone.0055190.s001.pdf]

Table S1. Table of Reactions. The model considers a maximum of 20 damage foci and the index *i* identifies species associated with processes relating to individual foci; the addition of *\_2* is added to accommodate modification of species, e.g. DNA-PK sDSB Complex<sub>*i*</sub><sub>*\_2*</sub> represents phosphorylated DNA-PK sDSB Complex.

| Reaction ID            | Reaction Formulae                                                                                                                                                                                        |
|------------------------|----------------------------------------------------------------------------------------------------------------------------------------------------------------------------------------------------------|
| <i>rea</i>             | Background Sources of Damage -> ROS                                                                                                                                                                      |
| <i>rebi</i>            | ROS + DNA <sub><i>i</i></sub> -> "Simple DSB" <sub><i>i</i></sub>                                                                                                                                        |
| <i>rec</i>             | ROS -> "ROS Degradation"                                                                                                                                                                                 |
| <i>redi</i>            | uKu70/80 -> Ku70/80 <sub><i>i</i></sub> ; "Simple DSB" <sub><i>i</i></sub>                                                                                                                               |
| <i>reei</i>            | Ku70/80 <sub><i>i</i></sub> -> uKu70/80                                                                                                                                                                  |
| <i>refi</i>            | Simple DSB <sub><i>i</i></sub> + Ku70/80 <sub><i>i</i></sub> -> "Ku70/80 sDSB Complex" <sub><i>i</i></sub>                                                                                               |
| <i>regi</i>            | Ku70/80 DSB Complex <sub><i>i</i></sub> -> "Simple DSB" <sub><i>i</i></sub> + Ku70/80 <sub><i>i</i></sub>                                                                                                |
| <i>rehi</i>            | uDNA-PKcs -> "DNA-PKcs" <sub><i>i</i></sub> ; "Simple DSB" <sub><i>i</i></sub>                                                                                                                           |
| <i>reii</i>            | DNA-PKcs <sub><i>i</i></sub> -> "uDNA-PKcs"                                                                                                                                                              |
| <i>reji</i>            | Ku70/80 sDSB Complex <sub><i>i</i></sub> + "DNA-PKcs" <sub><i>i</i></sub> -> "DNA-PK sDSB Complex" <sub><i>i</i></sub>                                                                                   |
| <i>reDNAPKai</i>       | DNA-PK sDSB Complex <sub><i>i</i></sub> -> "Simple DSB" <sub><i>i</i></sub> + Ku70/80 <sub><i>i</i></sub> + "DNA-PKcs" <sub><i>i</i></sub>                                                               |
| <i>reki</i>            | DNA-PK sDSB Complex <sub><i>i</i></sub> -> "DNA-PK sDSB Complex" <sub><i>i</i></sub> <sub><i>_2</i></sub>                                                                                                |
| <i>reDNAPKbi</i>       | DNA-PK sDSB Complex <sub><i>i</i></sub> <sub><i>_2</i></sub> -> "Simple DSB" <sub><i>i</i></sub> + Ku70/80 <sub><i>i</i></sub> + "DNA-PKcs" <sub><i>i</i></sub>                                          |
| <i>reli</i>            | uLiIV XRCC4 -> "LiIV XRCC4" <sub><i>i</i></sub> ; "DNA-PK sDSB Complex" <sub><i>i</i></sub> <sub><i>_2</i></sub>                                                                                         |
| <i>remi</i>            | LiIV XRCC4 <sub><i>i</i></sub> -> "uLiIV XRCC4"                                                                                                                                                          |
| <i>reni</i>            | DNA-PK sDSB Complex <sub><i>i</i></sub> <sub><i>_2</i></sub> + "LiIV XRCC4" <sub><i>i</i></sub> -> "DNA-PK LiIV XRCC4 sDSB Complex" <sub><i>i</i></sub>                                                  |
| <i>reoi</i>            | DNA-PK LiIV XRCC4 sDSB Complex <sub><i>i</i></sub> -> DNA <sub><i>i</i></sub> + Ku70/80 <sub><i>i</i></sub> + "DNA-PKcs" <sub><i>i</i></sub> + "LiIV XRCC4" <sub><i>i</i></sub> + "sDSB Accurate Repair" |
| <i>repi</i>            | ROS + DNA <sub><i>i</i></sub> -> "Complex DSB" <sub><i>i</i></sub>                                                                                                                                       |
| <i>reqi</i>            | uKu70/80 -> Ku70/80 <sub><i>i</i></sub> ; "Complex DSB" <sub><i>i</i></sub>                                                                                                                              |
| <i>reri</i>            | Complex DSB <sub><i>i</i></sub> + Ku70/80 <sub><i>i</i></sub> -> "Ku70/80 cDSB Complex" <sub><i>i</i></sub>                                                                                              |
| <i>resi</i>            | Ku70/80 cDSB Complex <sub><i>i</i></sub> -> "Complex DSB" <sub><i>i</i></sub> + Ku70/80 <sub><i>i</i></sub>                                                                                              |
| <i>reti</i>            | uDNA-PKcs -> "DNA-PKcs" <sub><i>i</i></sub> ; "Complex DSB" <sub><i>i</i></sub>                                                                                                                          |
| <i>reui</i>            | Ku70/80 cDSB Complex <sub><i>i</i></sub> + "DNA-PKcs" <sub><i>i</i></sub> -> "DNA-PK cDSB Complex" <sub><i>i</i></sub>                                                                                   |
| <i>reDNAPKci</i>       | DNA-PK cDSB Complex <sub><i>i</i></sub> -> "Complex DSB" <sub><i>i</i></sub> + Ku70/80 <sub><i>i</i></sub> + "DNA-PKcs" <sub><i>i</i></sub>                                                              |
| <i>revi</i>            | DNA-PK cDSB Complex <sub><i>i</i></sub> -> "DNA-PK cDSB Complex" <sub><i>i</i></sub> <sub><i>_2</i></sub>                                                                                                |
| <i>reDNAPKdi</i>       | DNA-PK cDSB Complex <sub><i>i</i></sub> <sub><i>_2</i></sub> -> "Complex DSB" <sub><i>i</i></sub> + Ku70/80 <sub><i>i</i></sub> + "DNA-PKcs" <sub><i>i</i></sub>                                         |
| <i>rewi</i>            | uLiIV XRCC4 -> "LiIV XRCC4" <sub><i>i</i></sub> ; "DNA-PK cDSB Complex" <sub><i>i</i></sub> <sub><i>_2</i></sub>                                                                                         |
| <i>rex<sub>i</sub></i> | DNA-PK cDSB Complex <sub><i>i</i></sub> <sub><i>_2</i></sub> + "LiIV XRCC4" <sub><i>i</i></sub> -> "DNA-PK LiIV XRCC4 cDSB Complex" <sub><i>i</i></sub>                                                  |
| <i>rey<sub>i</sub></i> | DNA-PK LiIV XRCC4 cDSB Complex <sub><i>i</i></sub> -> DNA <sub><i>i</i></sub> + Ku70/80 <sub><i>i</i></sub> + "DNA-PKcs" <sub><i>i</i></sub> + "LiIV XRCC4" <sub><i>i</i></sub> + "cDSB Accurate Repair" |
| <i>reMRNai</i>         | ATM <sub><i>i</i></sub> + MRN <sub><i>i</i></sub> -> "MRN ATM Complex" <sub><i>i</i></sub> ; "Simple DSB" <sub><i>i</i></sub>                                                                            |
| <i>reMRNbi</i>         | ATM <sub><i>i</i></sub> + MRN <sub><i>i</i></sub> -> "MRN ATM Complex" <sub><i>i</i></sub> ; "Ku70/80 sDSB Complex" <sub><i>i</i></sub>                                                                  |
| <i>reMRNci</i>         | ATM <sub><i>i</i></sub> + MRN <sub><i>i</i></sub> -> "MRN ATM Complex" <sub><i>i</i></sub> ; "Complex DSB" <sub><i>i</i></sub>                                                                           |
| <i>reMRNdi</i>         | ATM <sub><i>i</i></sub> + MRN <sub><i>i</i></sub> -> "MRN ATM Complex" <sub><i>i</i></sub> ; "Ku70/80 cDSB Complex" <sub><i>i</i></sub>                                                                  |
| <i>rezi</i>            | H2AX <sub><i>i</i></sub> -> H2AX <sub><i>i</i></sub> <sub><i>_2</i></sub> ; "MRN ATM Complex" <sub><i>i</i></sub>                                                                                        |
| <i>reaai</i>           | H2AX <sub><i>i</i></sub> -> H2AX <sub><i>i</i></sub> <sub><i>_2</i></sub> ; "DNA-PK sDSB Complex" <sub><i>i</i></sub> <sub><i>_2</i></sub>                                                               |
| <i>reabi</i>           | H2AX <sub><i>i</i></sub> -> H2AX <sub><i>i</i></sub> <sub><i>_2</i></sub> ; "DNA-PK cDSB Complex" <sub><i>i</i></sub> <sub><i>_2</i></sub>                                                               |
| <i>reaci</i>           | H2AX <sub><i>i</i></sub> <sub><i>_2</i></sub> -> "Damage Focus" <sub><i>i</i></sub>                                                                                                                      |
| <i>readi</i>           | Damage Focus <sub><i>i</i></sub> -> H2AX <sub><i>i</i></sub>                                                                                                                                             |
| <i>reaei</i>           | Damage Focus <sub><i>i</i></sub> + "MRN ATM Complex" <sub><i>i</i></sub> -> "Complete Damage Focus" <sub><i>i</i></sub>                                                                                  |
| <i>reafi</i>           | Complete Damage Focus <sub><i>i</i></sub> -> H2AX <sub><i>i</i></sub> + ATM <sub><i>i</i></sub> + MRN <sub><i>i</i></sub>                                                                                |

|                |                                                                                   |
|----------------|-----------------------------------------------------------------------------------|
| <b>reaqi</b>   | uPARP -> PARPi; "Simple DSB"                                                      |
| <b>reari</b>   | PARPi -> uPARP                                                                    |
| <b>reasi</b>   | Simple DSBi + PARPi -> "sDSB PARP Complex"                                        |
| <b>reati</b>   | sDSB PARP Complexi -> "Simple DSB" + PARPi                                        |
| <b>reaii</b>   | uLilii -> Liliii; "sDSB PARP Complex"                                             |
| <b>reavi</b>   | Liliii -> uLilii                                                                  |
| <b>reawi</b>   | sDSB PARP Complexi + Liliii -> "sDSB PARP-Lilii Complex"                          |
| <b>reaxi</b>   | sDSB PARP-Lilii Complexi -> DNAi + PARPi + Liliii + "sDSB Accurate Repair (PARP)" |
| <b>reayi</b>   | sDSB PARP-Lilii Complexi -> DNAi + PARPi + Liliii + "Deleterious sDSB Repair"     |
| <b>reMRNgi</b> | ATMi + MRNi -> "MRN ATM Complex"; "sDSB PARP Complex"                             |
| <b>reazi</b>   | uPARP -> PARPi; "Complex DSB"                                                     |
| <b>rebai</b>   | Complex DSBi + PARPi -> "cDSB PARP Complex"                                       |
| <b>rebbi</b>   | cDSB PARP Complexi -> "Complex DSB" + PARPi                                       |
| <b>rebcii</b>  | uLilii -> Liliii; "cDSB PARP Complex"                                             |
| <b>rebdii</b>  | cDSB PARP Complexi + Liliii -> "cDSB PARP-Lilii Complex"                          |
| <b>rebeii</b>  | cDSB PARP-Lilii Complexi -> DNAi + PARPi + Liliii + "cDSB Accurate Repair (PARP)" |
| <b>rebfii</b>  | cDSB PARP-Lilii Complexi -> DNAi + PARPi + Liliii + "Deleterious cDSB Repair"     |
| <b>reMRNhi</b> | ATMi + MRNi -> "MRN ATM Complex"; "cDSB PARP Complex"                             |
| <b>reMRNii</b> | ATMi + MRNi -> "MRN ATM Complex"; "DNA-PK DSB Complex"                            |
| <b>reMRNji</b> | ATMi + MRNi -> "MRN ATM Complex"; "DNA-PK DSB Complex <sub>2</sub> "              |
| <b>reMRNki</b> | ATMi + MRNi -> "MRN ATM Complex"; "DNA-PK LiIV XRCC4 DSB Complex"                 |
| <b>reMRNli</b> | ATMi + MRNi -> "MRN ATM Complex"; "DNA-PK cDSB Complex"                           |
| <b>reMRNmi</b> | ATMi + MRNi -> "MRN ATM Complex"; "DNA-PK cDSB Complex <sub>2</sub> "             |
| <b>reMRNni</b> | ATMi + MRNi -> "MRN ATM Complex"; "DNA-PK LiIV XRCC4 cDSB Complex"                |
| <b>reMRNoi</b> | ATMi + MRNi -> "MRN ATM Complex"; "sDSB PARP-Lilii Complex"                       |
| <b>reMRNpi</b> | ATMi + MRNi -> "MRN ATM Complex"; "cDSB PARP-Lilii Complex"                       |

---
