# Supplementary material for: Systems Modelling of NHEJ Reveals the Importance of Redox Regulation of Ku70/80 in the Dynamics of DNA Damage Foci
Source: PubMed Central journal article supplement (PMC3566652; doi:10.1371/journal.pone.0055190), 2013-02-06
Supplement: pone.0055190.s002.pdf [file pone.0055190.s002.pdf]

Table S3. Table of kinetic rate constants used in model with references.

| Rate Constant | Value   | Reaction                                                      | Source                 |
|---------------|---------|---------------------------------------------------------------|------------------------|
| kass_rea      | 0.001   | Production of ROS                                             | Experimental Data      |
| kass_reb      | 0.15    | Induction of a Simple DSB                                     | Experimental Data, [1] |
| kass_rec      | 0.03    | Degradation of ROS                                            | Experimental Data      |
| kass_red      | 0.6     | Recruitment of Ku70/80 to sDSB                                | [2]                    |
| kass_ree      | 0.02    | Ku70/80 leaving site of Damage                                | Model constant         |
| kass_ref      | 5e-006  | Ku70/80 binding to sDSB                                       | [3]                    |
| kass_reg      | 0.5     | Ku70/80 dissociation from sDSB                                | [3]                    |
| kass_reh      | 0.6     | Recruitment of DNA-PKcs to sDSB                               | [4]                    |
| kass_rei      | 0.02    | DNA-PKcs leaving site of Damage                               | Model constant         |
| kass_rej      | 9e-005  | DNA-PKcs binding to Ku70/80-sDSB Complex                      | [4]                    |
| kass_rek      | 0.3     | DNA-PK Autophosphorylation                                    | [4]                    |
| kass_rel      | 0.001   | Recruitment of LiIV/XRCC4 to sDSB                             | [5]                    |
| kass_rem      | 0.2     | LiIV/XRCC4 leaving site of Damage                             | Model constant         |
| kass_ren      | 0.00035 | LiIV/XRCC4 binding to DNA-PK-sDSB Complex                     | [5]                    |
| kass_reo      | 0.075   | Ligation of sDSB and dismantling of Repair Complex            | [5]                    |
| kass_rep      | 0.15    | Induction of a Complex DSB                                    | Experimental Data, [1] |
| kass_req      | 0.6     | Recruitment of Ku70/80 to cDSB                                | [2,6]                  |
| kass_rer      | 4e-006  | Ku70/80 binding to cDSB                                       | [3,6]                  |
| kass_res      | 0.4     | Ku70/80 dissociation from cDSB                                | [3]                    |
| kass_ret      | 0.6     | Recruitment of DNA-PKcs to cDSB                               | [4,6]                  |
| kass_reu      | 7e-005  | DNA-PKcs binding to Ku70/80-cDSB Complex                      | [4,6]                  |
| kass_rev      | 0.3     | DNA-PK Autophosphorylation                                    | [4,6]                  |
| kass_rew      | 0.001   | Recruitment of LiIV/XRCC4 to cDSB                             | [5]                    |
| kass_rex      | 0.0002  | LiIV/XRCC4 binding to DNA-PK-cDSB Complex                     | [5,6]                  |
| kass_rey      | 0.075   | Ligation of cDSB and dismantling of Repair Complex            | [5,6]                  |
| kMRN          | 0.75    | Activation and Binding of ATM and MRN                         | [7,8]                  |
| kass_rez      | 0.5     | H2AX Phosphorylation                                          | [9]                    |
| kass_reaa     | 0.5     | H2AX Phosphorylation                                          | [9]                    |
| kass_reab     | 0.5     | H2AX Phosphorylation                                          | [9]                    |
| kass_reac     | 0.5     | Damage Focus Formation                                        | [10]                   |
| kass_read     | 0.1     | Damage Focus Dismantling                                      | [10]                   |
| kass_reae     | 0.5     | ATM-MRN Complex binding to Damage Focus                       | [11]                   |
| kass_reaf     | 0.03    | ATM-MRN-Damage Focus Dismantling                              | [11]                   |
| kass_reaq     | 0.6     | Recruitment of PARP to sDSB                                   | [3]                    |
| kass_rear     | 0.02    | PARP leaving site of Damage                                   | Model constant         |
| kass_reas     | 5e-007  | PARP binding to sDSB                                          | [3]                    |
| kass_reat     | 0.02    | PARP dissociation from sDSB                                   | [3]                    |
| kass_reau     | 0.005   | Recruitment of LiIII/XRCC3 to sDSB                            | [12,13]                |
| kass_reav     | 0.02    | LiIII/XRCC3 leaving site of Damage                            | Model constant         |
| kass_reaw     | 0.00035 | LiIII/XRCC3 binding to DNA-PK-sDSB Complex                    | [12,13]                |
| kass_reax     | 0.0006  | Accurate ligation of sDSB and dismantling of Repair Complex   | [1,14]                 |
| kass_reay     | 0.0009  | Inaccurate ligation of sDSB and dismantling of Repair Complex | [1,14]                 |
| kass_reaz     | 0.6     | Recruitment of PARP to cDSB                                   | [3]                    |
| kass_reba     | 4e-007  | PARP binding to cDSB                                          | [3]                    |
| kass_rebb     | 0.02    | PARP leaving site of Damage                                   | [3]                    |

|             |        |                                                               |         |
|-------------|--------|---------------------------------------------------------------|---------|
| kass_rebc   | 0.005  | Recruitment of LIII/XRCC3 to cDSB                             | [12,13] |
| kass_rebd   | 0.0002 | LIII/XRCC3 binding to DNA-PK-cDSB Complex                     | [12,13] |
| kass_rebe   | 0.0006 | Accurate ligation of cDSB and dismantling of Repair Complex   | [1,14]  |
| kass_rebf   | 0.0009 | Inaccurate ligation of cDSB and dismantling of Repair Complex | [1,14]  |
| kdiss_DNAPK | 0.02   | DNA-PK dissociation from DSB                                  | [3,4]   |

1. Covo S, de Villartay J-P, Jeggo PA, Livneh Z (2009) Translesion DNA synthesis-assisted non-homologous end-joining of complex double-strand breaks prevents loss of DNA sequences in mammalian cells. *Nucl Acids Res* 37: 6737-6745.
2. Mari P-O, Florea BI, Persengiev SP, Verkaik NS, Brüggewirth HT, et al. (2006) Dynamic assembly of end-joining complexes requires interaction between Ku70/80 and XRCC4. *Proceedings of the National Academy of Sciences* 103: 18597-18602.
3. Wang M, Wu W, Wu W, Rosidi B, Zhang L, et al. (2006) PARP-1 and Ku compete for repair of DNA double strand breaks by distinct NHEJ pathways. *Nucl Acids Res* 34: 6170-6182.
4. Uematsu N, Weterings E, Yano K-i, Morotomi-Yano K, Jakob B, et al. (2007) Autophosphorylation of DNA-PKCS regulates its dynamics at DNA double-strand breaks. *J Cell Biol* 177: 219-229.
5. Yano K, Chen DJ (2008) Live cell imaging of XLF and XRCC4 reveals a novel view of protein assembly in the non-homologous end-joining pathway. *Cell cycle (Georgetown, Tex)* 7: 1321.
6. Dobbs TA, Palmer P, Maniou Z, Lomax ME, O'Neill P (2008) Interplay of two major repair pathways in the processing of complex double-strand DNA breaks. *DNA Repair* 7: 1372-1383.
7. Celeste A, Fernandez-Capetillo O, Kruhlak MJ, Pilch DR, Staudt DW, et al. (2003) Histone H2AX phosphorylation is dispensable for the initial recognition of DNA breaks. *Nat Cell Biol* 5: 675-679.
8. Lukas C, Melander F, Stucki M, Falck J, Bekker-Jensen S, et al. (2004) Mdc1 couples DNA double-strand break recognition by Nbs1 with its H2AX-dependent chromatin retention. *EMBO J* 23: 2674-2683.
9. Leatherbarrow EL, Harper JV, Cucinotta FA, O'Neill P (2006) Induction and quantification of  $\gamma$ -H2AX foci following low and high LET-irradiation. *International Journal of Radiation Biology* 82: 111 - 118.
10. Schultz LB, Chehab NH, Malikzay A, Halazonetis TD (2000) P53 Binding Protein 1 (53bp1) Is an Early Participant in the Cellular Response to DNA Double-Strand Breaks. *The Journal of Cell Biology* 151: 1381-1390.
11. Cann KL, Hicks GG (2007) Regulation of the cellular DNA double-strand break response. *Biochemistry and Cell Biology* 85: 663-674.
12. Wang H, Rosidi B, Perrault R, Wang M, Zhang L, et al. (2005) DNA Ligase III as a Candidate Component of Backup Pathways of Nonhomologous End Joining. *Cancer Research* 65: 4020-4030.
13. Windhofer F, Wu W, Iliakis G (2007) Low levels of DNA ligases III and IV sufficient for effective NHEJ. *Journal of Cellular Physiology* 213: 475-483.
14. Ahmed EA, de Boer P, Philippens MEP, Kal HB, de Rooij DG (2009) Parp1-XRCC1 and the repair of DNA double strand breaks in mouse round spermatids. *Mutation Research/Fundamental and Molecular Mechanisms of Mutagenesis* 683: 84-90.
